# Supplementary material
Source: HighWire-hosted journal article supplement (https://diabetes.diabetesjournals.org/content/suppl/2005/02/28/54.3.694)
Supplement: Pg694SupplementalFigure.pdf [file Pg694SupplementalFigure.pdf]

# Supplemental Figure 1

**Figure 1G**

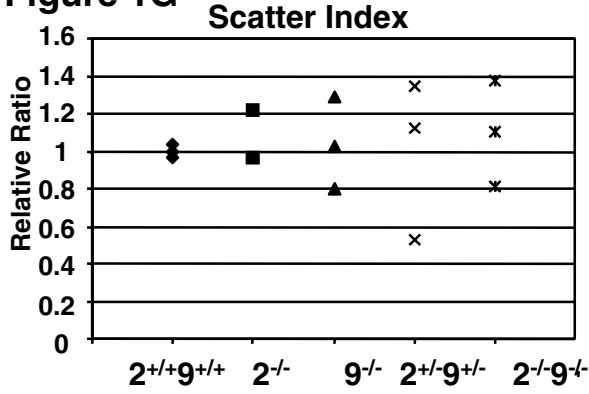

**Figure 1H**

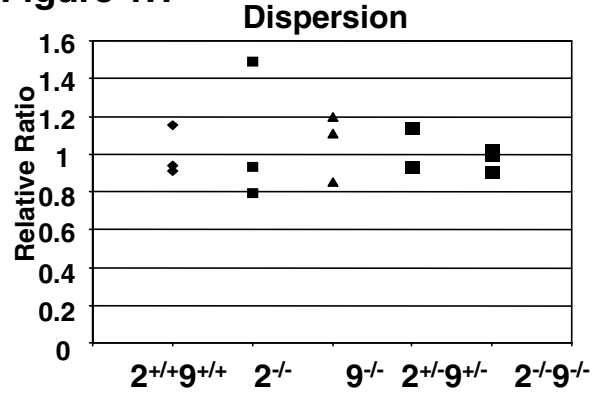

**Figure 2A**

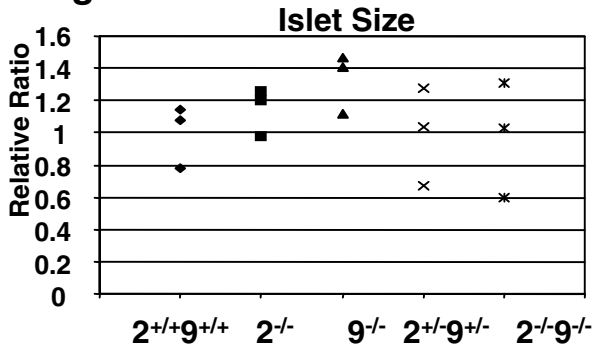

**Figure 2B**

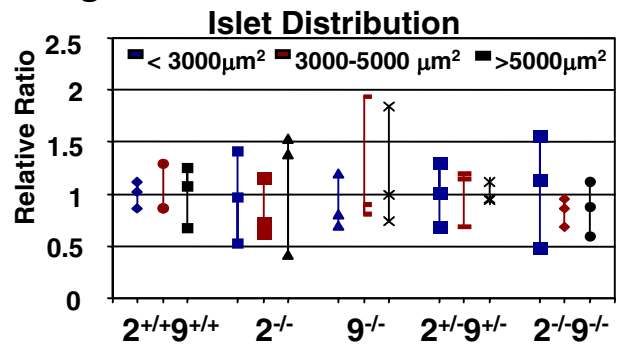

**Figure 4G**

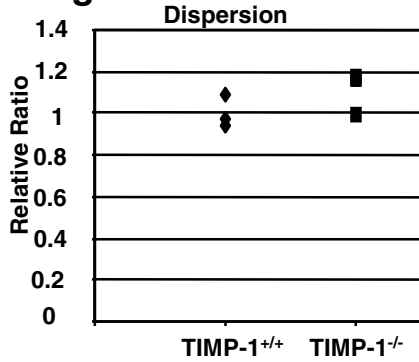

**Figure 4I**

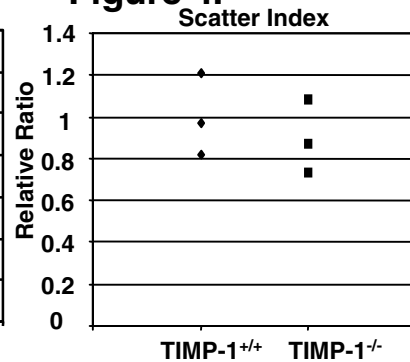

**Figure 4H**

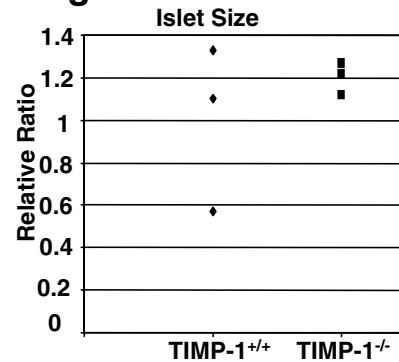

**Figure 5J**

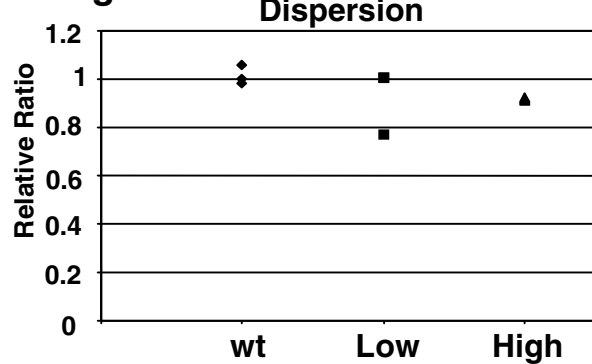

**Figure 5K**

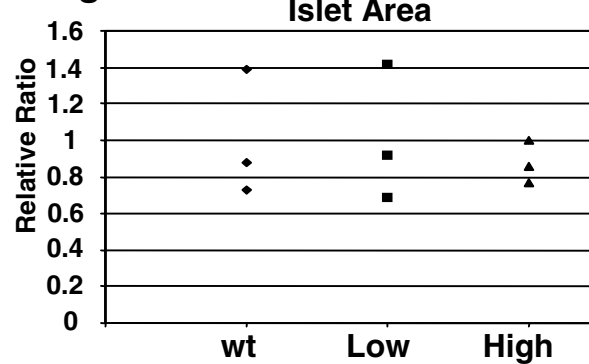

**Figure S1.** Scatter plot presentation of the data used to generate the graph bars in the corresponding Figures of the article.
