# Supplementary material
Source: HighWire-hosted journal article supplement (https://diabetes.diabetesjournals.org/content/suppl/2005/02/28/54.3.694)
Supplement: Pg694SupplementalMethods.pdf [file Pg694SupplementalMethods.pdf]

The oligonucleotides used for amplification of cDNA were as follows:

|                           |                               |
|---------------------------|-------------------------------|
| <i>MMP3</i> (sense)       | 5'-TAA AAG CAT TCA CAC CCT GG |
| <i>MMP3</i> (anti-sense)  | 5'-TGC GAA GAT CCA CTG AAG AA |
| <i>MMP7</i> (sense)       | 5'-GAG TCA CTC TTC TGT TCC CG |
| <i>MMP7</i> (anti-sense)  | 5'-AAG GAA GAG GGA GAC AGG TG |
| <i>MMP8</i> (sense)       | 5'-CTG GGC TCT AAG TGG CTA TG |
| <i>MMP8</i> (anti-sense)  | 5'-GTG GTC CQC TGA AGA AGA GG |
| <i>MMP10</i> (sense)      | 5'-GCT TCC CAA GAC AGA TAA CA |
| <i>MMP10</i> (anti-sense) | 5'-ATG CAT CCT CTC ACC TAC TG |
| <i>MMP11</i> (sense)      | 5'-GTC CCT CAA AGT AGA ACC CC |
| <i>MMP11</i> (anti-sense) | 5'-GCC TTT GAG GTT CCG TGT CT |
| <i>MMP12</i> (sense)      | 5'-ATC TTC CAA GGA GCC TAT CA |
| <i>MMP12</i> (anti-sense) | 5'-CTC CCC TTA TTT CCT GTT AC |
| <i>MMP13</i> (sense)      | 5'-ACC CAC TTG TTC TAA TGA CC |
| <i>MMP13</i> (anti-sense) | 5'-AGG AAA GCA GAG AGG GAT TA |
| <i>MMP14</i> (sense)      | 5'-CTC CAG CCT CCC TTC TCA GT |
| <i>MMP14</i> (anti-sense) | 5'-GGG GGA TGG AAA AGA AGC AG |
| <i>MMP15</i> (sense)      | 5'-TCT GTC TCC TCT GCC TCC CT |
| <i>MMP15</i> (anti-sense) | 5'-CTA AAC GAT GGG GAG TGG GG |
| <i>MMP16</i> (sense)      | 5'-AGC ACT GTG AAA GCC ATA GC |
| <i>MMP16</i> (anti-sense) | 5'-TCC CCA TGA GTG TAT TTC CA |
| <i>MMP17</i> (sense)      | 5'-GCA GTT TCT GTC ATT GGG CA |

|                           |                               |
|---------------------------|-------------------------------|
| <i>MMP17</i> (anti-sense) | 5'-AGG GCA GAG TAG GGT GGC TT |
| <i>MMP19</i> (sense)      | 5'-GAC TCT GCC TCC CTC TCA TT |
| <i>MMP19</i> (anti-sense) | 5'-GAC AGT TTC CCT CCA CCA GA |
| <i>MMP20</i> (sense)      | 5'-AGT TCA GTC TCC AGC ACC CA |
| <i>MMP20</i> (anti-sense) | 5'-TGT AGT TGC TGG GTT TCT GC |
| <i>MMP23</i> (sense)      | 5'-GTA CAA GGA CCA GGA ACC CC |
| <i>MMP23</i> (anti-sense) | 5'-GCT TTA TCT GCT GCC TTC CA |
| <i>MMP24</i> (sense)      | 5'-TGT GGC TGT CCT TGT CCC CT |
| <i>MMP24</i> (anti-sense) | 5'-GCC TGG CCT ATT CCC TTG AG |
